# Supplementary material for: 2'-O-methoxyethyl splice-switching oligos correct splicing from IVS2-745 β-thalassemia patient cells restoring hemoglobin A production and chain rebalance
Source: PubMed Central journal article supplement — Haematologica. 2020 May 21;106(5):1433–42. doi: 10.3324/haematol.2019.226852 (PMC8094087; doi:10.3324/haematol.2019.226852), 2020-05-21
Supplement: 2019_226852-DisclosuresContributions.pdf [file 2019_226852-DisclosuresContributions.pdf]

Haematologica  
HAEMATOL/2019/226852  
Version 4

2'-O-methoxyethyl splice-switching oligos correct splicing from  
IVS2-745  $\beta$ -thalassemia patient cells restoring HbA production and  
chain rebalance

Alisa Dong, Valentina Ghiaccio, Irene Motta, Shuling Guo, Raechel Peralta, Susan M. Freier, Andy Watt, Sagar Damle, Yasuhiro Ikawa, Danuta Jarocha, Maxwell Chappell, Coralea Stephanou, Paola Delbini, Connie Chen, Soteroula Christou, Marina Kleanthous, Kim Smith-Whitley, Deepa Manwani, Carla Casu, Osheiza Abdulmalik, Maria Domenica Cappellini, Stefano Rivella, and Laura Breda

Disclosures: Stefano Rivella: Consultant for Disc Medicine, Protagonist, LJPC, Meira GTx, SAB for Meira GTx, Ionis Pharmaceuticals, Stocks - Meira GTx; Grants (not for this publication) R01DK095112-NIDDK, European Community-FP7, AVLT-Italy, CURE-PA Dept of Health, Calliope Foundation, Dept of Defense (DOD), Ionis Pharmaceuticals, Merganser Biotech, Medgenics Pharmaceuticals Shuling Guo, Raechel Peralta, Susan M. Freier, and Andy Watt are employees of Ionis Pharmaceuticals. Ionis intends to file patent. Dr. Cappellini financial disclosures: Advisory Board Vifor, Sanofi/Genzyme, Novartis, Celgene, Bluebird Alisa Dong is an employee of Aruvant Sciences and former employee of LEK Consulting. Irene Motta is on the Advisory Board Sanofi Genzyme.

Contributions: AD, VG, LB performed research, data analysis, and wrote the manuscript. LB and SR supervised the study. SG, RP, SMF, AW performed research on oligos. IM, YI, DJ, MC, CS, PD, CC, SC, MK, KSW, DM, CC, OA, and MDC performed research.
